# Supplementary material for: Dingo Density Estimates and Movements in Equatorial Australia: Spatially Explicit Mark–Resight Models
Source: MDPI journal article supplement (doi:10.3390/ani10050865), 2020-05-17
Supplement: s1 [file s1]

## Dingo density estimates and movements in equatorial Australia: Spatially explicit mark-resight models

Vanessa Gabriele-Rivet\*, Julie Arsenault, Victoria Brookes, Peter J.S. Fleming, Charlotte Nury & Michael P. Ward

Correspondence: Vanessa Gabriele-Rivet [vgab5928@uni.sydney.edu.au](mailto:vgab5928@uni.sydney.edu.au)

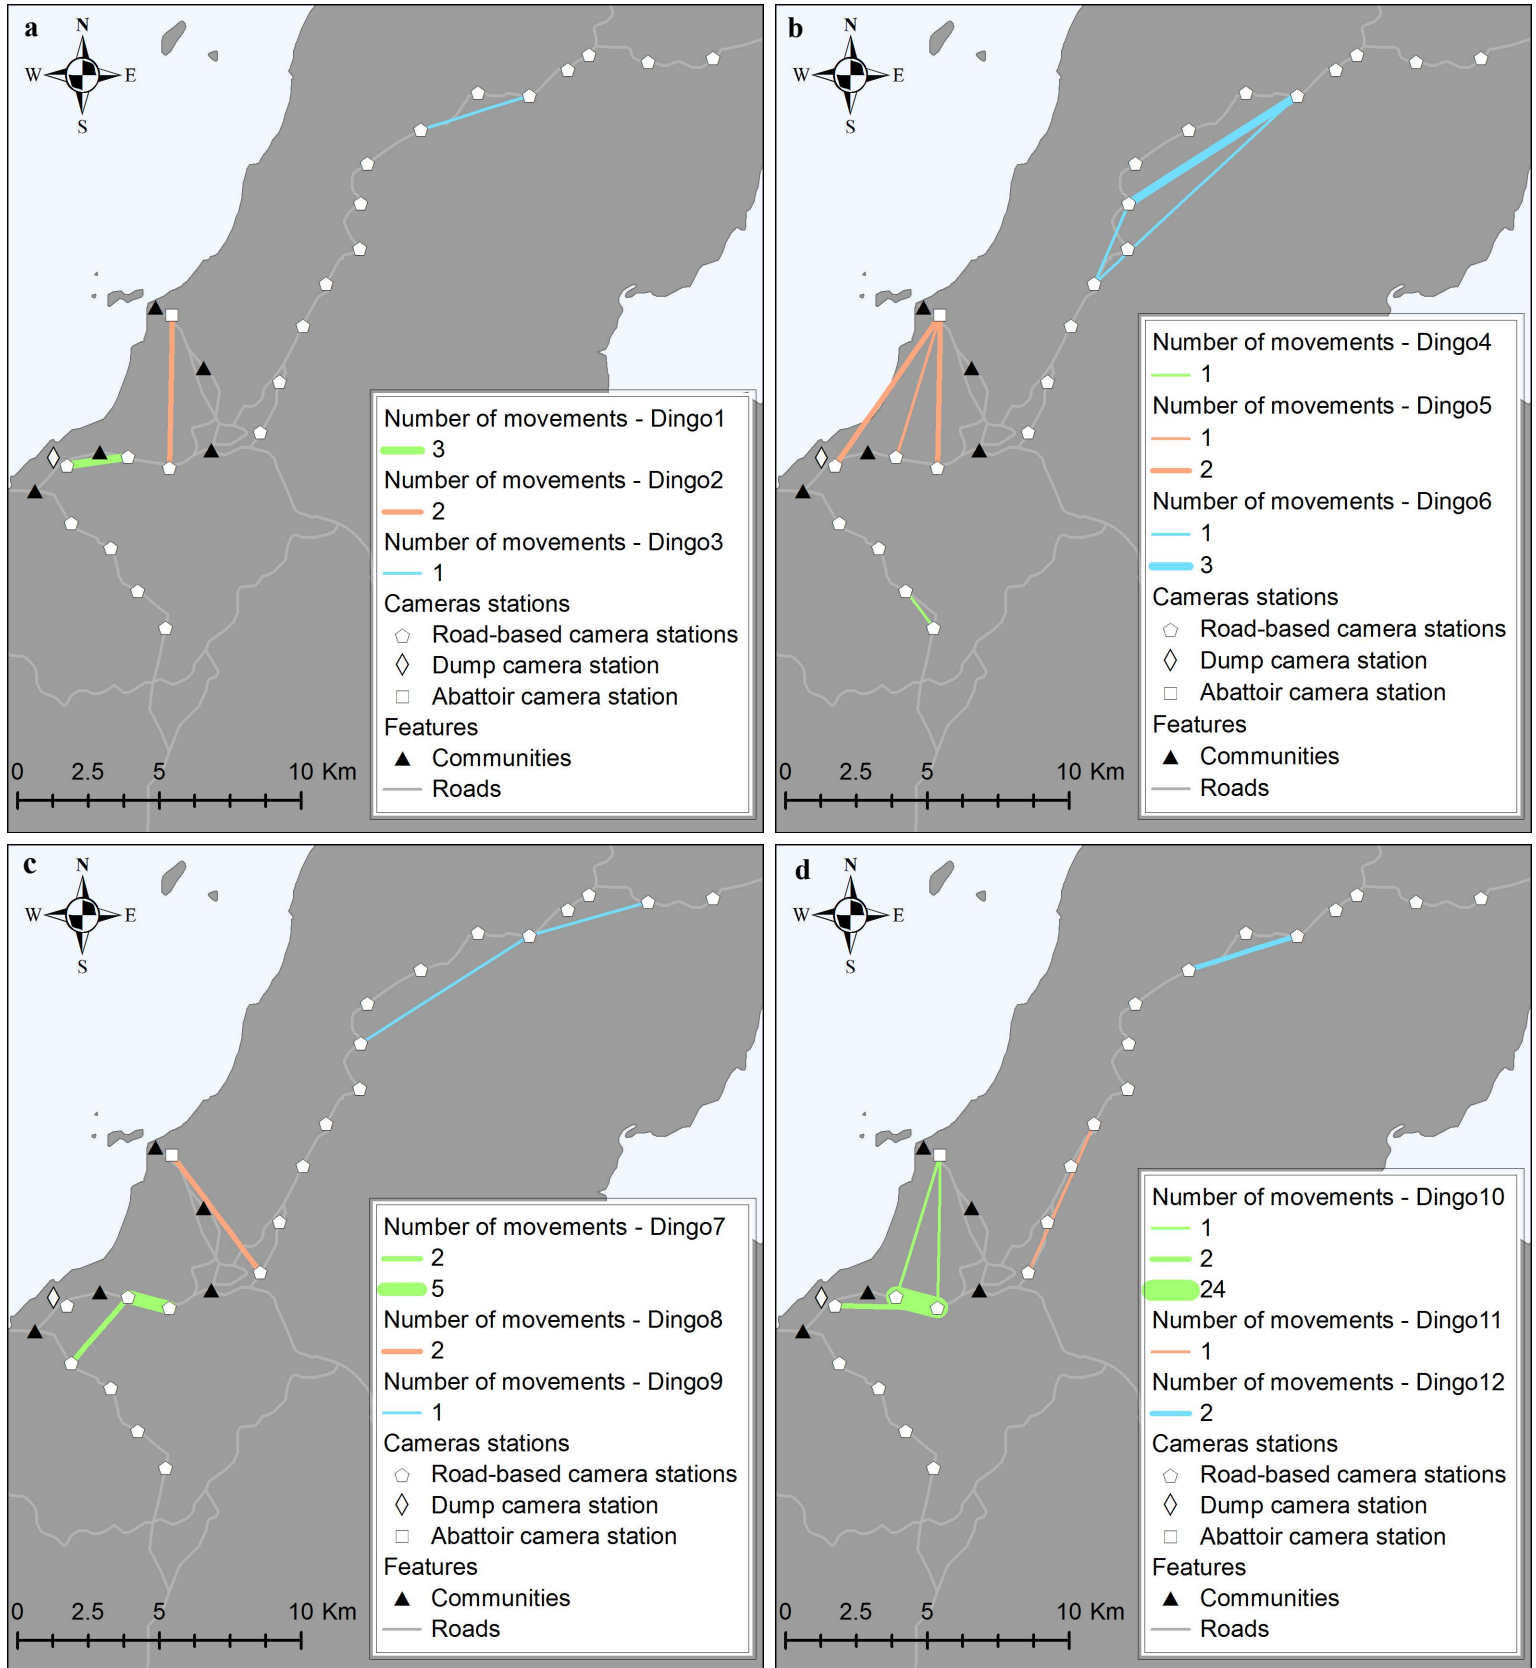

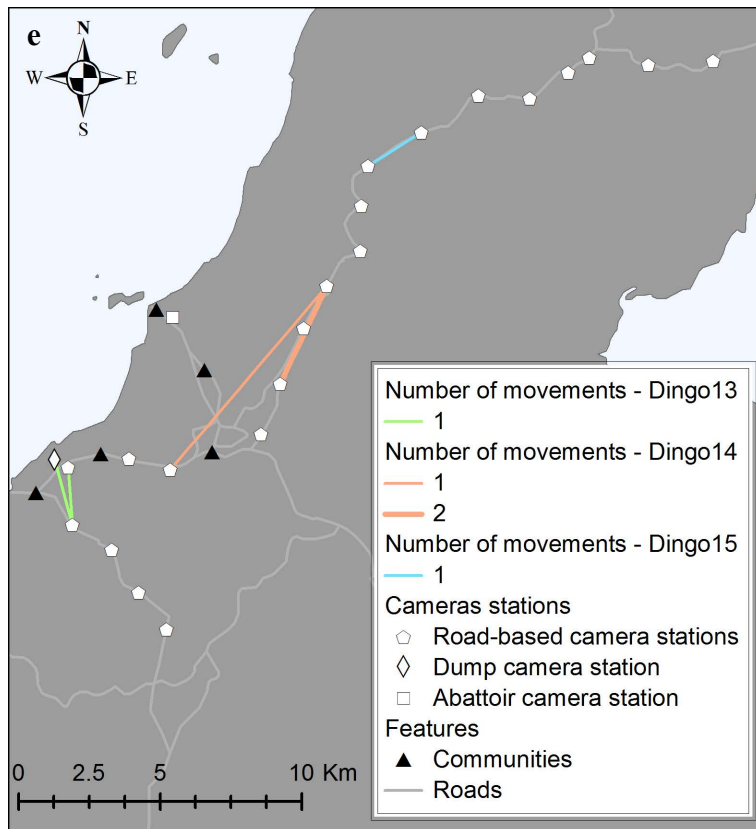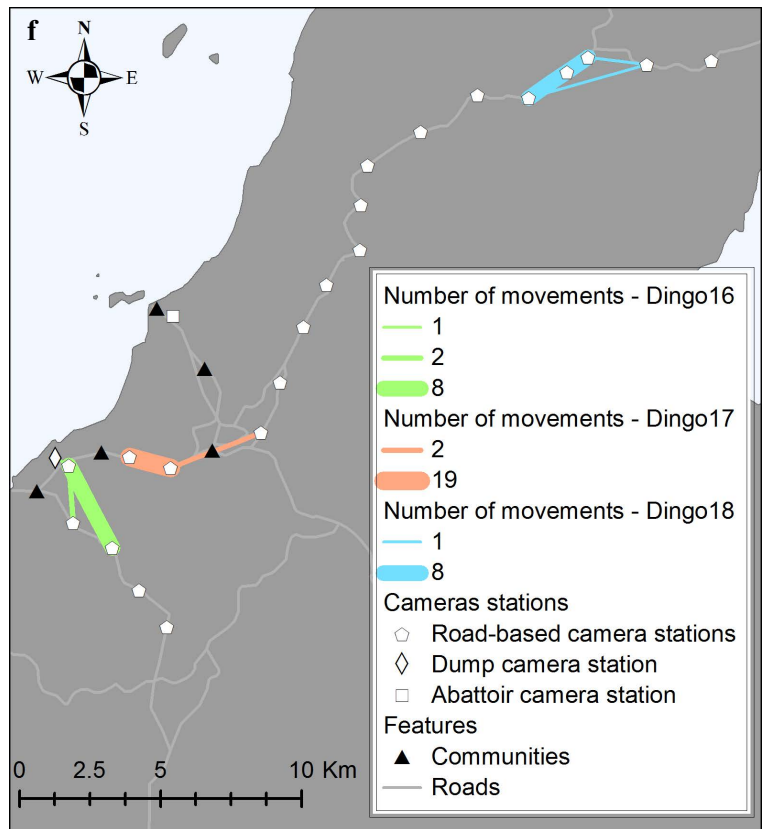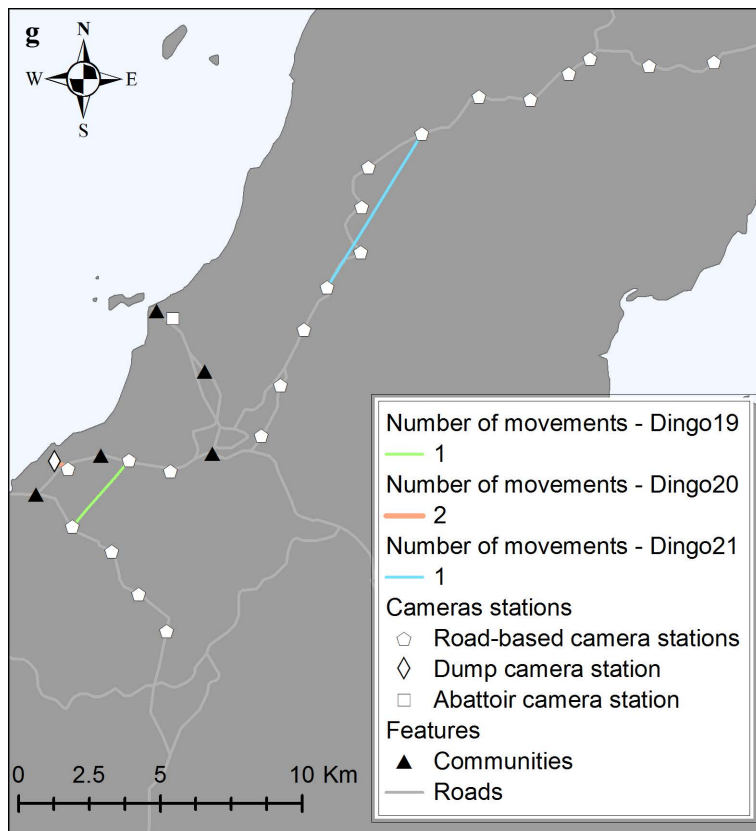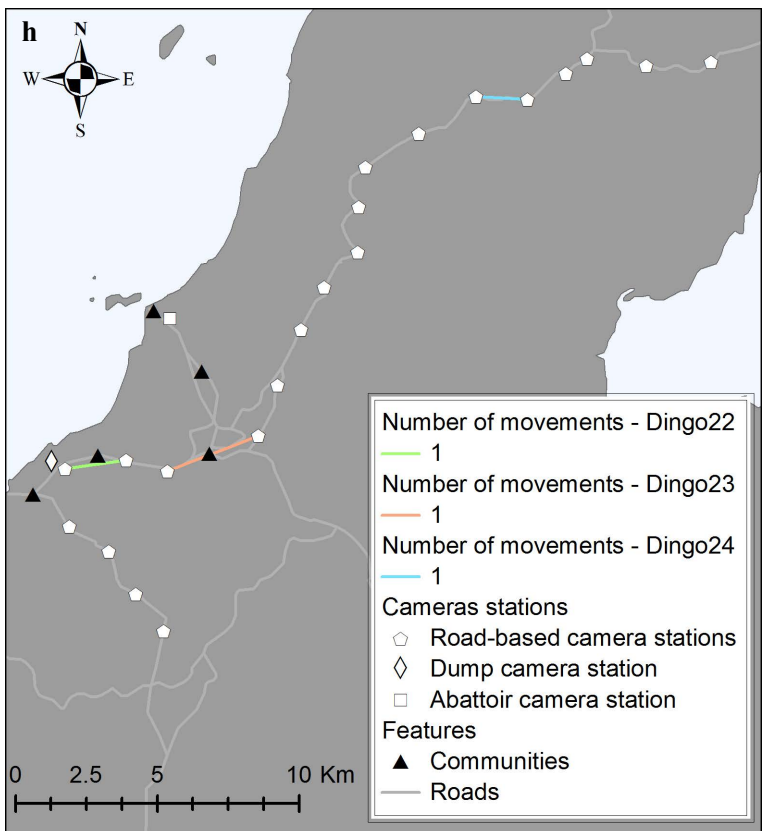

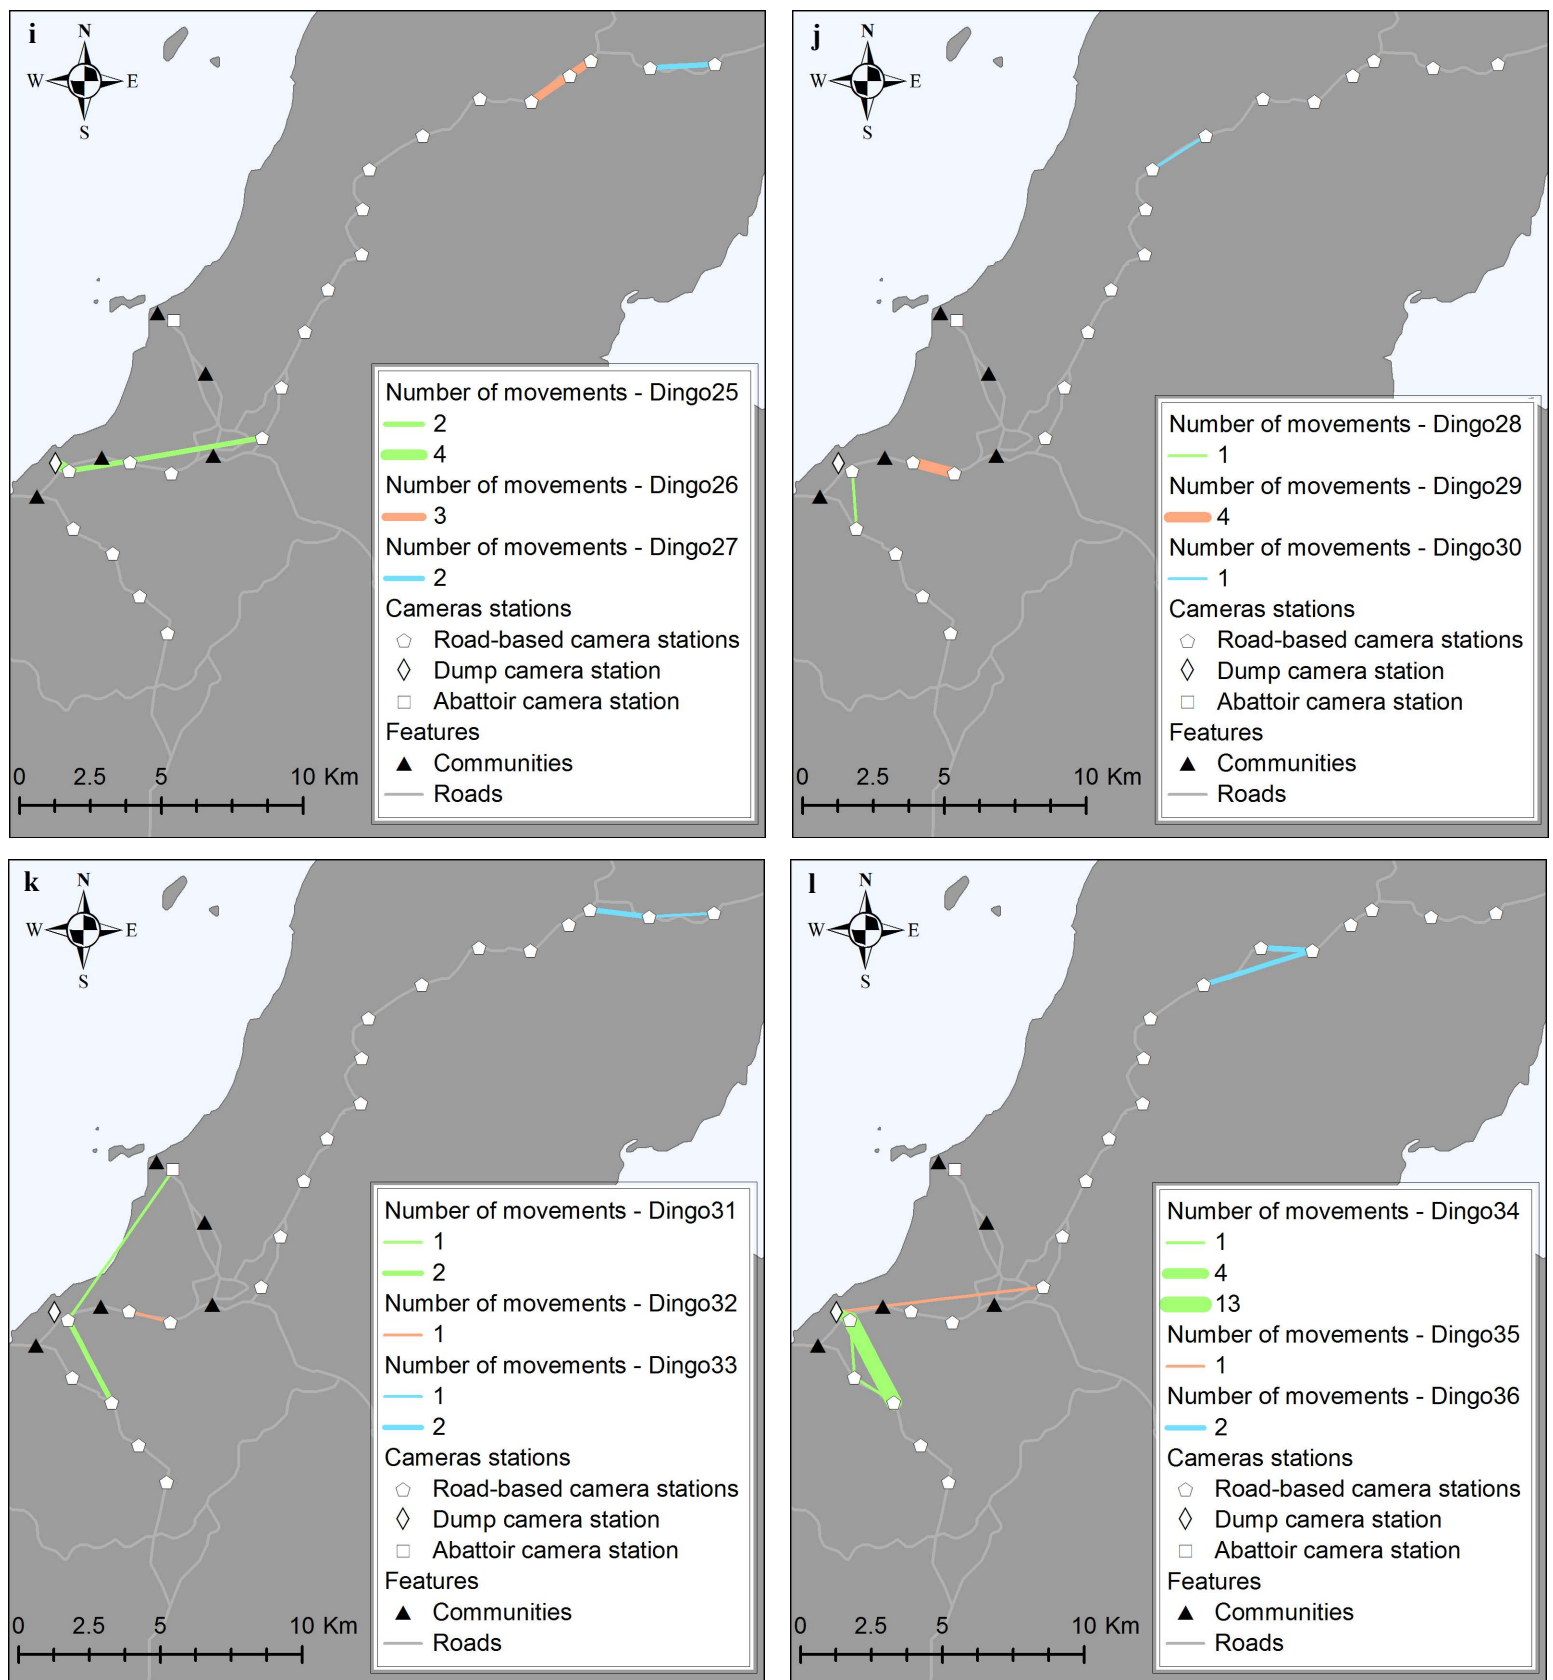

**Fig. S1** (a-l) Number of movements between camera stations for each moving marked individual dingo (n=36), based on captures from a camera-trap study conducted in the NPA of Queensland, Australia, from May 2016 to May 2017

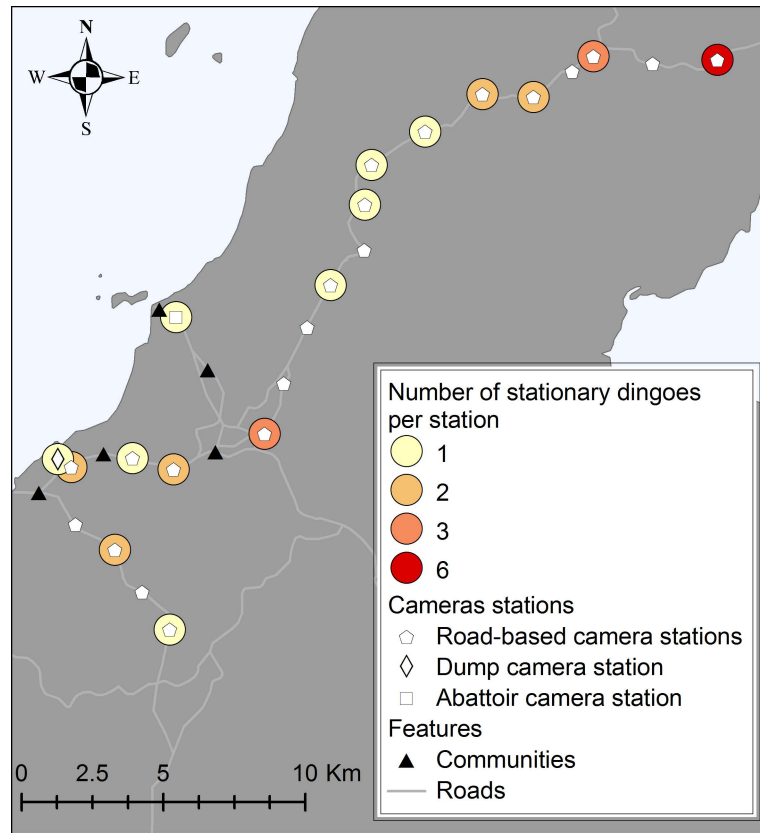

**Fig. S2** Number of stationary dingoes per station (n=30), based on captures from a camera-trap study conducted in the NPA of Queensland, Australia, from May 2016 to May 2017

**Table S1.** SEMR multi-session models ranked based on Akaike Information Criteria corrected for small sample size (AICc), based on a camera-trap study to estimate density of a dingo population in the NPA of Queensland, Australia, monitored from May 2016 to May 2017.

| Detection function | Effort adjustment | Density covariates | Detection covariates |         | Nb param | logLik  | AIC <sub>c</sub> | ΔAIC <sub>c</sub> | w    |
|--------------------|-------------------|--------------------|----------------------|---------|----------|---------|------------------|-------------------|------|
|                    |                   |                    | g0                   | sigma   |          |         |                  |                   |      |
| Step 1             |                   |                    |                      |         |          |         |                  |                   |      |
| HN                 | N                 | N                  | N                    | N       | 4        | -3193.8 | 6396.0           | 0                 | 1.00 |
| HHN                | N                 | N                  | N                    | N       | 4        | -3253.6 | 6515.5           | 119.5             | 0.00 |
| Step 2             |                   |                    |                      |         |          |         |                  |                   |      |
| HN                 | Effort 2          | N                  | N                    | N       | 4        | -3171.0 | 6350.2           | 0                 | 1.00 |
| HN                 | N                 | N                  | N                    | N       | 4        | -3193.8 | 6396.0           | 45.8              | 0.00 |
| HN                 | Effort 1          | N                  | N                    | N       | 4        | -3210.1 | 6428.4           | 78.2              | 0.00 |
| Step 3             |                   |                    |                      |         |          |         |                  |                   |      |
| HN                 | Effort 2          | Habitat + Session  | Site                 | Session | 12       | -3097.6 | 6222.0           | 0                 | 1.00 |
| HN                 | Effort 2          | Habitat + Session  | Site                 | N       | 9        | -3114.7 | 6248.9           | 29.6              | 0.00 |
| HN                 | Effort 2          | Habitat + Session  | N                    | Session | 11       | -3134.7 | 6293.6           | 71.6              | 0.00 |
| HN                 | Effort 2          | Habitat + Session  | Nb cams              | N       | 9        | -3138.9 | 6297.3           | 75.4              | 0.00 |
| HN                 | Effort 2          | Habitat + Session  | N                    | Season  | 9        | -3140.3 | 6300.1           | 78.1              | 0.00 |
| HN                 | Effort 2          | Habitat + Session  | Visibility           | N       | 9        | -3147.6 | 6314.7           | 92.7              | 0.00 |
| HN                 | Effort 2          | Habitat + Session  | N                    | N       | 8        | -3150.8 | 6318.8           | 96.8              | 0.00 |
| HN                 | Effort 2          | Habitat + Session  | N                    | Habitat | 9        | -3150.7 | 6320.9           | 98.9              | 0.00 |
| Step 4             |                   |                    |                      |         |          |         |                  |                   |      |
| HN                 | Effort 2          | Season             | Site                 | Session | 9        | -3098.1 | 6215.7           | 0                 | 0.40 |
| HN                 | Effort 2          | N                  | Site                 | Session | 8        | -3099.5 | 6216.3           | 0.6               | 0.30 |
| HN                 | Effort 2          | Habitat + Season   | Site                 | Session | 10       | -3098.1 | 6218.1           | 2.4               | 0.12 |
| HN                 | Effort 2          | Habitat            | Site                 | Session | 9        | -3099.5 | 6218.5           | 2.8               | 0.10 |
| HN                 | Effort 2          | Session            | Site                 | Session | 11       | -3097.7 | 6219.6           | 3.9               | 0.06 |
| HN                 | Effort 2          | Habitat + Session  | Site                 | Session | 12       | -3097.6 | 6222.0           | 6.3               | 0.02 |

Nb param = Number of parameters; logLik = Log likelihood value; w = weight of each model; HN = Half-Normal detection function; HHN = Hazard Half-Normal detection function; Effort 1 = Number of camera trap days; Effort 2 = ; Number of operational days; Habitat = 2-class spatial environment covariate; Site = 2-class station-specific covariate allowing the distinction of road-based from focal point stations; Session = Categorical session-specific covariate to explore differences between all 4 sessions; Season = 2-class season-specific covariate to explore differences between the dry season (sessions 1 and 2) and the wet season (sessions 3 and 4); Nb cams = Continuous station-specific covariate comprising the average number of active cameras, based on days with at least one active camera, for each station; Visibility = Continuous degree of visibility covariate, taking into account obstruction due to vegetation growth at each station and each occasion.

**Table S2.** Parameter estimates (density, sigma and  $g0$ ) from the second top model of a spatially explicit multi-session mark–resight model, using a half-Normal detection function, for a dingo population in the NPA of Queensland, Australia, monitored from May 2016 to May 2017 (Session 1: May 9th – August 18th; Session 2: August 19th – November 16th; Session 3: November 17th – February 14th; Session 4: February 15th – May 15th).

|                                            | Mean  | (95 % CI)     |
|--------------------------------------------|-------|---------------|
| Parameter estimates of model               |       |               |
| Density (individuals per km <sup>2</sup> ) | 0.141 | (0.132-0.151) |
| Sigma (km)                                 |       |               |
| Session 1                                  | 1.14  | (1.08-1.21)   |
| Session 2                                  | 1.24  | (1.15-1.34)   |
| Session 3                                  | 1.11  | (0.103-1.18)  |
| Session 4                                  | 0.66  | (0.60-0.72)   |
| $g0$                                       |       |               |
| Focal point stations                       | 0.132 | (0.109-0.160) |
| Road-based stations                        | 0.366 | (0.311-0.423) |
